# Supplementary material
Source: PubMed Central journal article supplement (PMC2915718)
Supplement: supp_M110.125872_JBC_supplemental_article_2731__.pdf [file supp_M110.125872_JBC_supplemental_article_2731__.pdf]

## SUPPLEMENTAL INFORMATION

Xiaogang Gu<sup>1</sup>, John Glushka<sup>1</sup>, Sung G Lee<sup>1</sup> and Maor Bar-Peled<sup>1,2,3</sup>

<sup>1</sup>Complex Carbohydrate Research Center (CCRC); <sup>2</sup>Dept. of Plant Biology; University of Georgia, Athens, GA 30602

<sup>3</sup>Address correspondences to: Maor Bar-Peled, CCRC 315 Riverbend Rd., Athens, GA 30602  
Fax: 706-542-4412; Email: [peled@ccrc.uga.edu](mailto:peled@ccrc.uga.edu)

### Supplemental Figures

#### FIGURE S1. Protein sequence alignments and phylogenetic relationship of UDP-GlcA decarboxylases and UXNAcS.

A. Protein sequences of *C. elegans* SQV-1 (NP\_501418, amino acid 127 to 467); of *C. neoformans* Uxs1p (AAK59981, from amino acid 77 to 410); of Arabidopsis AtUxs3 (AF387789, amino acid 31 to 357); of Sinorhizobium SmUxs1 (GU062741, from amino acid 19 to 348); of Potato StUaxs (ABC75032, from amino acid 7 to 386); of Ralstonia RsU4kpxs (GQ369438); of ArnA (AY057445, from amino acid 311 to 660); of *Bacillus anthracis* UXNAcS homolog, Ba-UXNAcS (NP\_843043) and of UXNAcS were aligned with ClustalX software and the conserved motifs are shown.

B. Phylogenetic relationships of selected UDP-GlcA decarboxylases and UXNAcS. Protein sequences of AtUxs3; of SQV-1; of Uxs1p; of SmUxs1; of ArnA; of *E. tasmaniensis* ArnA homolog, Et-ArnA (YP\_001908305, from amino acid 311 to 660); of RsU4kpxs; of StUaxs; of Arabidopsis Uaxs, AtAxs1 (AAC73015) and of UXNAcS were first aligned with ClustalX software. Alignments were subsequently analyzed using MEGA version 4 (1) to generate the phylogenetic tree. Percentage bootstrap values of 1,000 replicates are given at each branch point. Branch lengths are shown to scale.

#### FIGURE S2. MALDI-MS analysis of UDP-GlcNAcA and UDP-XylNAc, the enzymatic products of UGlcNAcDH and UXNAcS, respectively.

The enzymatic products of UGlcNAcDH (panel 1) and UXNAcS (panel 2) were collected from the HPLC-column (see Fig. 2 and Fig. 4, respectively) and analyzed by MALDI-MS in the negative-ion model. The ion mass, calculated (abbr. Cal.) or observed (abbr. Obs.), are listed below the spectrum.

#### FIGURE S3. Monitoring the combined UGlcNAcDH and UXNAcS activities by Real-time 1D NMR.

Progression of the enzymatic conversion of UDP-GlcNAc and NAD<sup>+</sup> to UDP-GlcNAcA and NADH; and subsequently to UDP-XylNAc at 0 min, 5 min, 60 min or 120 min are shown. The selected NMR regions pointing to diagnostic peaks for the two protons linked to C-4 of nicotinamide ring of NADH is shown from 2.6 to 2.8 (Panel 3). The region corresponding to the diagnostic anomeric protons of the NDP-sugars, are shown from 5.4 to 5.6 (Panel 2). The region corresponding to other diagnostic peaks for NAD<sup>+</sup> and NADH are shown from 6.0 to 6.2 ppm (Panel 1). The dual-enzyme assay comprised double the amount of UGlcNAcDH compared to the single-enzyme dehydrogenase assay. The labeling for protons belonging to NAD<sup>+</sup> (N) and NADH (H) are as shown in Fig. 6. Peaks labeled as I, II or III indicate the anomeric protons of UDP-GlcNAc, UDP-GlcNAcA or UDP-XylNAc, respectively. For presentation clarity, the vertical scale of panel 1 is six times that of panel 2; and panel 3 scale is three times that of panel 2.

#### FIGURE S4. The effects of buffer composition, pH and temperature on UDP-XylNAc synthase activity.

- A. The activity of recombinant UXNacS was analyzed in different buffers (Tris-HCl and sodium phosphate) at different pH. Each value is the mean of triplicate reactions.
- B. The activity of recombinant UXNacS was analyzed at different temperatures in 50 mM sodium phosphate buffer, pH 8.2. Each value is the mean of triplicate reactions.

**FIGURE S5. Size estimation of active UXNacS**

Recombinant UXNacS was fractionated on a Superdex-200 gel filtration column and an aliquot of each fraction was assayed for UXNacS activity. The amount of UDP-XylNAc formed (indicated by ●) in each assay was plotted against the time. The mass of the calculated monomer protein is 37 kDa and the molecular weight of the enzyme in solution was estimated to be around 70 kDa based on the interpolation from the relative elution time of standard protein markers from the column (indicated by ▲).

**FIGURE S6. 3D-Structural model of Bacillus UXNacS with Human Uxs1.**

Three-dimensional structure models for Bacillus UXNacS were predicted using both the “Protein Homology/analogY Recognition Engine” PHYRE web ([sbg.bio.ic.ac.uk/~phyre/](http://sbg.bio.ic.ac.uk/~phyre/)) server (25) and the SWISS-MODEL comparative protein-modeling server ([swissmodel.expasy.org/](http://swissmodel.expasy.org/)). Structural models were superimposed with the unpublished 1.21Å crystal structures of the human Uxs1 that was complexed with UDP and NAD<sup>+</sup> (2b69A1.pdb, deposited at SGC ‘Structural, Genomics Consortium’). All models and protein structures were visualized using PyMol. The ribbon represents the superimposed structure of human Uxs1 and UXNacS. The conserved structure of human Uxs1 and UXNacS is colored in orange and yellow, respectively. The non-conserved structure between human Uxs1 and UXNacS are highlighted in red and green respectively. The crystal structures of the human Uxs1 bound NAD<sup>+</sup> and UDP are shown in red and blue respectively.

### Supplemental Tables

**Table S1.** Proton chemical shifts and coupling constants of purified UDP-GlcNAcA and UDP-XylNAc.

| Position | <sup>13</sup> C NMR signals |          | <sup>1</sup> H NMR signals |                                      |         |                                            |
|----------|-----------------------------|----------|----------------------------|--------------------------------------|---------|--------------------------------------------|
|          | UDP-XylNAc <sup>a</sup>     | Position | UDP-GlcNAcA <sup>b</sup>   | UDP-XylNAc <sup>a</sup>              |         |                                            |
|          | δ (ppm)                     |          | δ (ppm)                    | J (Hz)                               | δ (ppm) | J (Hz)                                     |
| XylNAc   |                             | Sugar    |                            |                                      |         |                                            |
| C1''     | 97.5                        | H1''     | 5.535                      | $J_{1'',2''}$ 3.3<br>$J_{1'',P}$ 7.5 | 5.454   | $J_{1'',2''}$ 3.3<br>$J_{1'',P}$ 6.8       |
| C2''     | 56.3                        | H2''     | 4.014                      | $J_{2'',3''}$ 9.3                    | 3.962   | $J_{2'',3''}$ 9.6<br>$J_{2'',P}$ 3.0       |
| C3''     | 73.8                        | H3''     | 3.815                      | $J_{3'',4''}$ 9.3                    | 3.73    | $J_{3'',4''}$ 10                           |
| C4''     | 72.5                        | H4''     | 3.595                      | $J_{4'',5''}$ 10.1                   | 3.71    | -                                          |
| C5''     | 65.3                        | H5a''    | 4.161                      | -                                    | 3.806   | $J_{5a'',4''}$ 5.5<br>$J_{5a'',5b''}$ 11.2 |
|          |                             | H5b''    | -                          | -                                    | 3.760   | $J_{5b'',4''}$ 10.2                        |
|          |                             | NAc      | 2.069                      | -                                    | 2.064   | -                                          |
| Rib      |                             | Rib      |                            |                                      |         |                                            |
| C1'      | 91.4                        | H1'      | 5.963                      | -                                    | 5.971   | -                                          |
| C2'      | 76.6                        | H2'      | 4.362                      | -                                    | 4.365   | -                                          |
| C3'      | 72.4                        | H3'      | 4.327                      | -                                    | 4.350   | -                                          |
| C4'      | 85.8                        | H4'      | 4.272                      | -                                    | 4.280   | -                                          |
| C5'      | 67.8                        | H5a'     | 4.255                      | -                                    | 4.239   | -                                          |
|          |                             | H5b'     | 4.15                       | -                                    | 4.175   | -                                          |
| Uracil   |                             | Uracil   |                            |                                      |         |                                            |
| C5       | 105.3                       | H5       | 5.952                      | -                                    | 5.957   | -                                          |
| C6       | 153.6                       | H6       | 7.905                      | -                                    | 7.944   | -                                          |

UDP-GlcNAcA was purified from HPLC after reaction of recombinant *Bacillus* UGlcNAcDH with UDP-GlcNAc and NAD<sup>+</sup>. UDP-XylNAc was purified from HPLC after reaction of recombinant *Bacillus* UXNAcS with UDP-GlcNAcA. The purified products were lyophilized, re-suspended in D<sub>2</sub>O and analyzed by NMR.

<sup>a</sup> Chemical shifts were determined at 25 °C using 900 MHz NMR and referenced to 2,2-dimethyl-2-silapentane-5-sulphonate.

<sup>b</sup> Chemical shifts were determined at 37 °C using 600 MHz and referenced to 2,2-dimethyl-2-silapentane-5-sulphonate.

## REFERENCE

1. Tamura, K., Dudley, J., Nei, M., and Kumar, S. (2007) *Mol Biol Evol* **24**, 1596-1599

**A.**

**GXXGXX**

: \* \*\* \* \*\* . : :

\* \*

```

SQV-1 -SVRYRNE---ETRKRILITGGAGFVGSHLVDKMLLDG-----HEVIALDNYFTGR---KKNVE---
Uxs1p  PPVKLLPN---HERKRILVTGGAGFVGSHLVDRLMLLG-----HEVTVDNFFFTGS---RTTVS---
AtUxs3  SPSPLRNSKFCQPNNRILISGGAGFIGSHLVDKLMENEK-----NEVVVADNYFTGS---KENLK---
SmUxs1  -TDSLRRR---SLQKRILVTGGAGFIGSHLCELLGAG-----HEVICLDNFSFTGL---RRNIA---
UXNAcS  -----MKKRLITGGAGFIGSHLAEELVVRG-----HPVTVDNFKYKGSKYHEELT---
Ba-UXNAcS -----MSKCLITGGAGFIGSHLAEELVVRG-----YNVTVDNFVKGNKYHDELM---
RsU4kpxs -----MKKVLILGVNGFIGHLSKRILESTDP EISQWEVYVGMMDQTERLGDVFN-----
Arna    -----TARRRTRVLILGVNGFIGNHLTERLLR-----EDHYEVYGLDIGSDAISRFLN-----
StUaxs  -----DGNPIKPMTCMIGAGGFIGSHLCEKLSM-----ETPHTVLAVDVYSDKIKHLLLEPTSLPW
    
```

```

SQV-1 --HWIGHPNFEMVHHDVVNPFVFEVDQIYHLASASPAPHYMYNPVKTIKTNTLGTINMLGLAKRVKAT
Uxs1p  --HWIGHPNFEMVRHDVVEPFLIEVDQIYHLACASPAPHYQINAVKTLKTSFEGTLNMLGLAKRTGAR
AtUxs3  --KWIGHPRFELIRHDVTEPLLI EVDRIYHLACASPAPIFYKYNPVTIKTNVIGTLNMLGLAKRVGAR
SmUxs1  --PLKRFDTFRVIAHDVVEPIDLEVD EYINLACASPAPHYQADPIQTTKTCVIGSLNLLDLAARGAR
UXNAcS  --GNIP IIPISILDKN SMHELVNQHDVVFHLAAAILGVKTTMEKSI ELIETNFDGTRN ILQAALKGKKK
Ba-UXNAcS --KEIRVIPISVLDKNSIYELVNQHDVVFHLAAAILGVKTTMEKSI ELIETNFDGTRN ILQAALKGKKK
RsU4kpxs HPRMHFFEGDITINK EWVEYHVRKCDVILPLVAIATPSTYVKAPLRFVDFEANLP IVRSAAKYVKH
Arna    HPHFHFVEGDISIHS EWI EYHVKKCDVVLPLVAIATPIEYTRNPLRVFELDFEENLR IIRYCVKYRKR
StUaxs  NGRIQFHRINIKND-SRLEGLIKMADLTVNLAICTPADYNTRPLDTIYSNFIDALPVVVKYCSENGKR
    
```

**SE** **YXXX**

.. \*\* \* : \*\*

\* \* \* \* \*

```

SQV-1 VLLASTSEVYGDPE-----VHPQPEYWGHVNTIGPRACYDEGKRVAESLMVAYNK
Uxs1p  FLITSTSEVYGDPE-----EHPQREYWGHVNCIGPRACYDEGKRVAEETLTGYHR
AtUxs3  ILLTSTSEVYGDPL-----IHPQPEYWGNVNPIGVRSCYDEGKRVAEETLMFDYHR
SmUxs1  IFQASTSEIYGDPL-----VHPQVEYWGNVNPFGRPSYDEGKRVCAETLFFDFHK
UXNAcS  VIFASTSEVYGGKT-----PPFSEDDDRLYGATSKIRWSYAICKLEETLCLGYAL
Ba-UXNAcS VVFASTSEVYGGKAK-----PPFSEEDDRLYGATSKIRWSYAICKLEETLCLGYAL
RsU4kpxs LVFPSTSEVYG-----MCGDDE-----FDPEASPLVYGPINKPRWIYACSKQLMDRVIWYGY-
Arna    IIFPSTSEVYG-----MCSDKY-----FDEHNSLIVGPVNKPRWIYSVSKQLLDRVIWAYGE
StUaxs  LIHFSTCEVYGKTIGAFLEPDSPLRQDPAYFVLS E EASPCIFGP I EQRWSYACAKQLIERLIYAEGA
    
```

: . : \* \* \* \* \*

```

SQV-1 QENIKIRIARIFNTFGPRMNMN-----DGRVVSNFIIQALQDKPITIYNGTQTRSFQYVTLV
Uxs1p  KDGVEVRVARIFNTFGPRMNPY-----DGRVVSNFIIQALKGEDMTVYGDGQSOTRSFQYVHDLI
AtUxs3  QHGI EIRIARIFNTY GPRMNI D-----DGRVVSNFIAQALRGEALTQKPGTQTRSFQYVDMV
SmUxs1  SHGVEIKIVRIFNTY GPRMRP D-----DGRVVSNFIVQALKGEDITIYGDGQSOTRSFCFVEDLI
UXNAcS  QG-LPVTIVRYFNIYGPRAKDG P-----YAGVIPRFIRAALQGDLLVYGDGQTRCFTYVSDAV
Ba-UXNAcS EG-LPVTIVRYFNIYGPRAKDG P-----YAGVIPRFISAALQGEDILVYGDGQTRCFTYVSDAV
RsU4kpxs MEGLNFTLFRPFNWIGPGLDSIH---TPKEGSSRVVTQFLGHIVRGENLDVYDGGQKRAFTYVDDGI
Arna    KEGLQFTLFRPFNWMPRLDNLN---AARIGSSRAITQLILNLVEGSPIKLIDGGKQKRCFTDIRDGI
StUaxs  ENGLEFTIVRPFNWIGPRMDFIPGIDGPSEGVPRVLAFCFSNNLLRHEPLKLVYDGGHSQRTFIYIKDAI
    
```

: . :

\* \* \* : : : . . :

```

SQV-1 DGLIKLMNS--NY--SLPVNIGNP-E EHTIGQFATIIRDLPVPGSTS-----EIVNLESQ
Uxs1p  DGLILLMNG--PD--TRPVNIGNG-DEFTILEFAEAVRDIVEKVQKE---EGNPLAKRVNIIHKEIP
AtUxs3  DGLIRLMNG--ND--TGPINIGNP-GEFTMVELAETVKELINPSIE-----IKMVENT
SmUxs1  DGFVRLMAS--PPSLTGPVNLGNP-AEFTIGELAEVIRLTGSRSK-----IVRRPLP
UXNAcS  EATIAAMDE--KVN-GEIINIGSE-DEKSIQEV AQDIHQ LTHSSSK-----IVHVPFEKVYPHG
Ba-UXNAcS EATIRAMDE--KVN-GEIINIGSE-NEKSIKEVAEVIKLLTDSSSK-----IVQVPFEEVYPHG
RsU4kpxs DALVRI IANKDGVASGKIYNI GNPSNNYSVRELAEMMLKKGATIAEYK E NAQVKVLVETTSGAYYKGG
Arna    EALYRI IENAGNRCDGEI INIGNPEN EASIEELGEMLLASFEKHPLRHHFPPFAGFRVVESSSYKGG
StUaxs  EAVFLMIEN- PARANGHIFNVGNPNNEVTVKQLAEMMTQVYKSVSG--ETPLETPTVDVSSKEFYGEG
    
```

: . : \* \* . : . : :

```

SQV-1 QDDPQQRPRDIRRAEQISWAPQVHMKDGLLKTVDYFRAEIDRNKRGGKPVPEPVR LAGLESRR
Uxs1p  IDDPQRPRPDTTRAKESLQWQPRNVVRQGEEMVRYYSARIREGAI-----
AtUxs3  PDDPRQRKPDISKAKEVLGWEPKVKLR EGLPLMEEDFRLRLNVP RN-----
SmUxs1  VDDPRQRPRDISLATEELGWRPKVNLA EGLAHTIRYFDDLRSRSMRESAELV-----
UXNAcS  FEEIPNRKPDVTKLKEMCQFHPNVSWEQGLKETIQWFREIEND-----
Ba-UXNAcS FEEIPNRKPDVTKLKDVLVQFQAKVTWEDGLKETIKWFREEDNG-----
RsU4kpxs YQDVQNRVPKIANTEELGWKPTT MEDTLANI FEAYREHAAEARS LVD-----
Arna    YQDVEHRKPSIRNAHRCLDWEPKIDMQ ETIDETLDFLRTVDLTDKPS-----
StUaxs  YDSDKRIPDMTI INRQLGWNPKTSLWDLLESTLTYQHRTYAEAVKQAMSKTTAN-----
    
```

**B.**

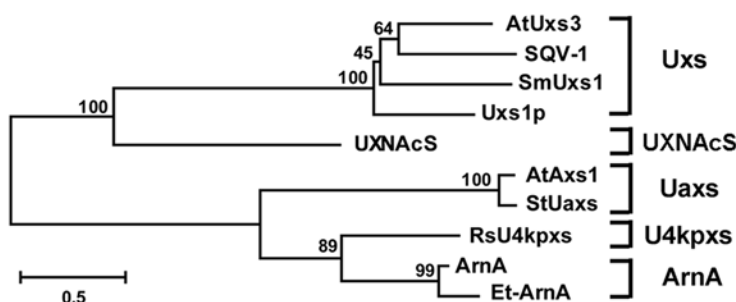

Figure S2

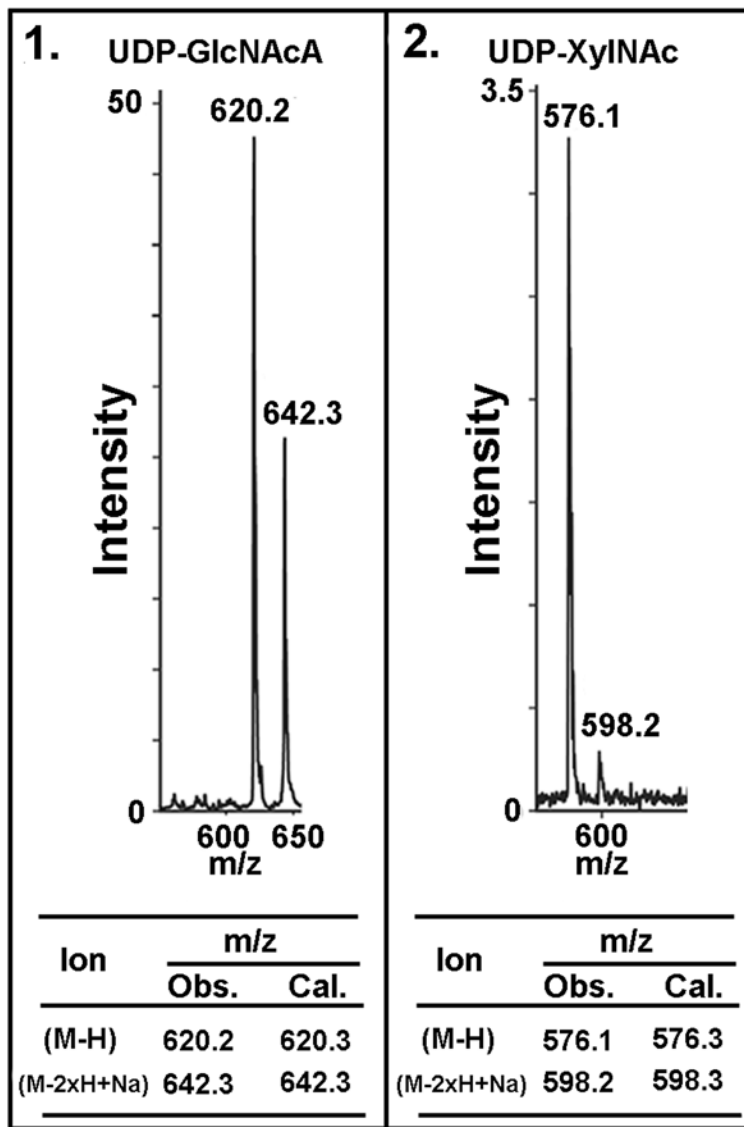

Figure S3

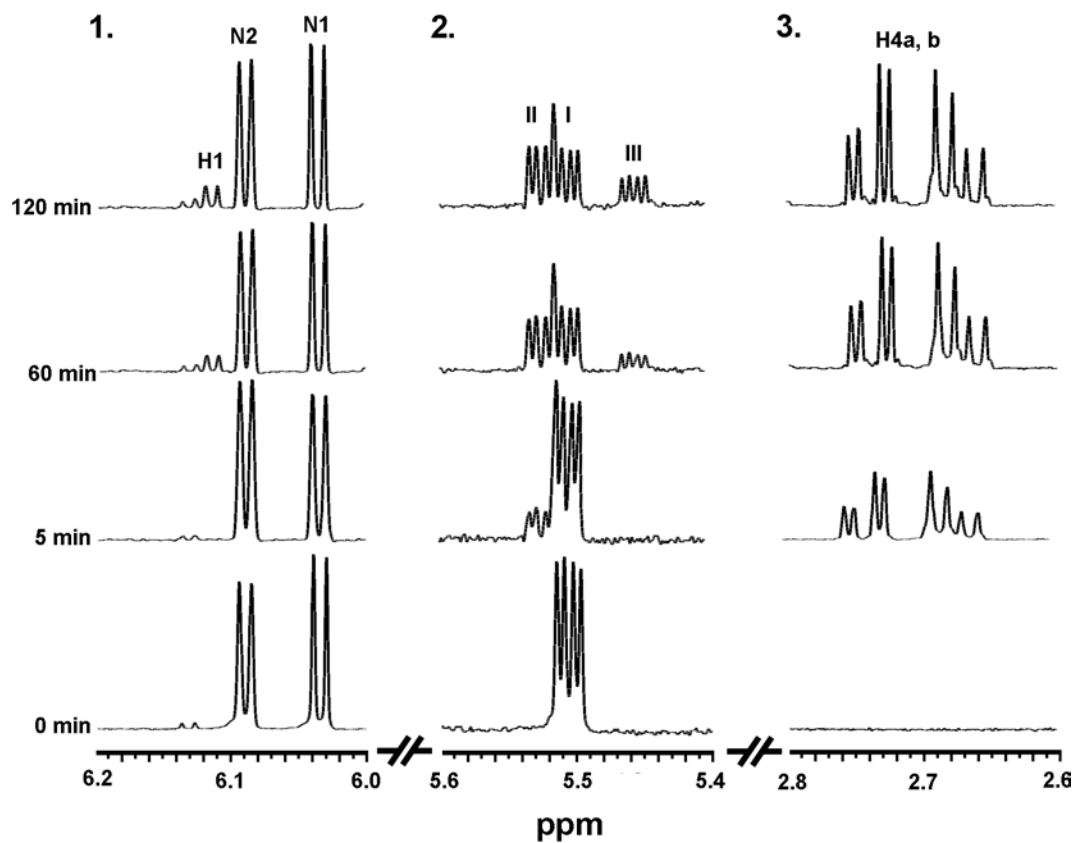

Figure S4

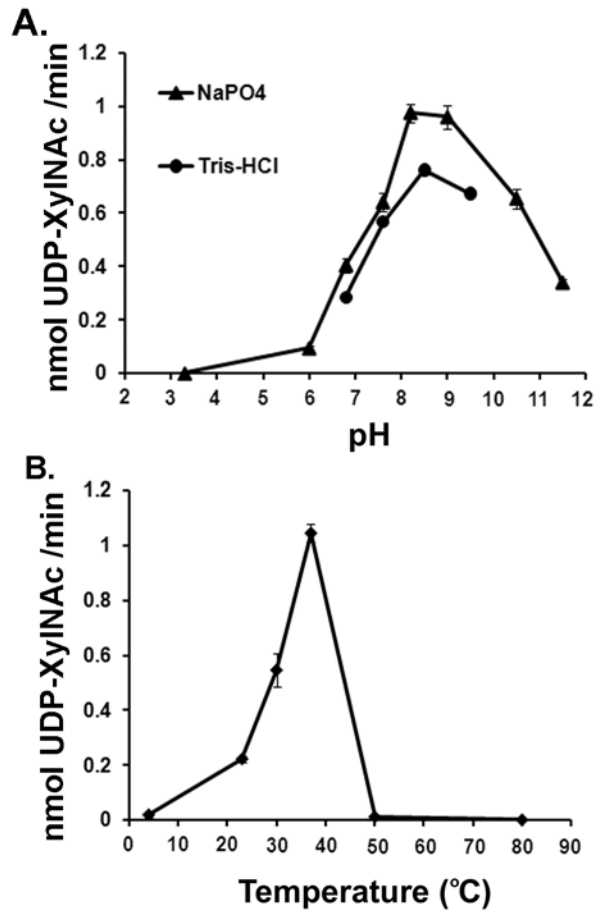



Figure S5

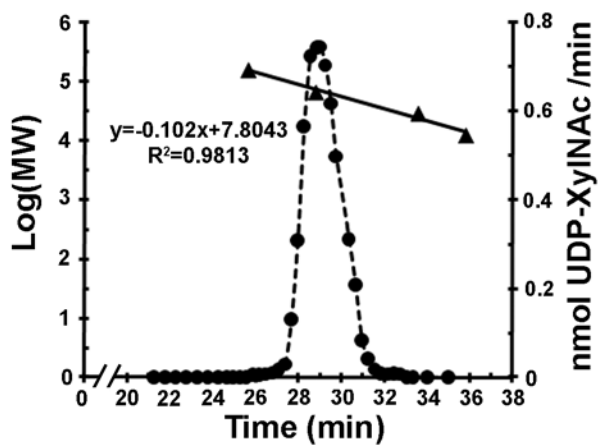

Gu et al., 2010

Figure S6

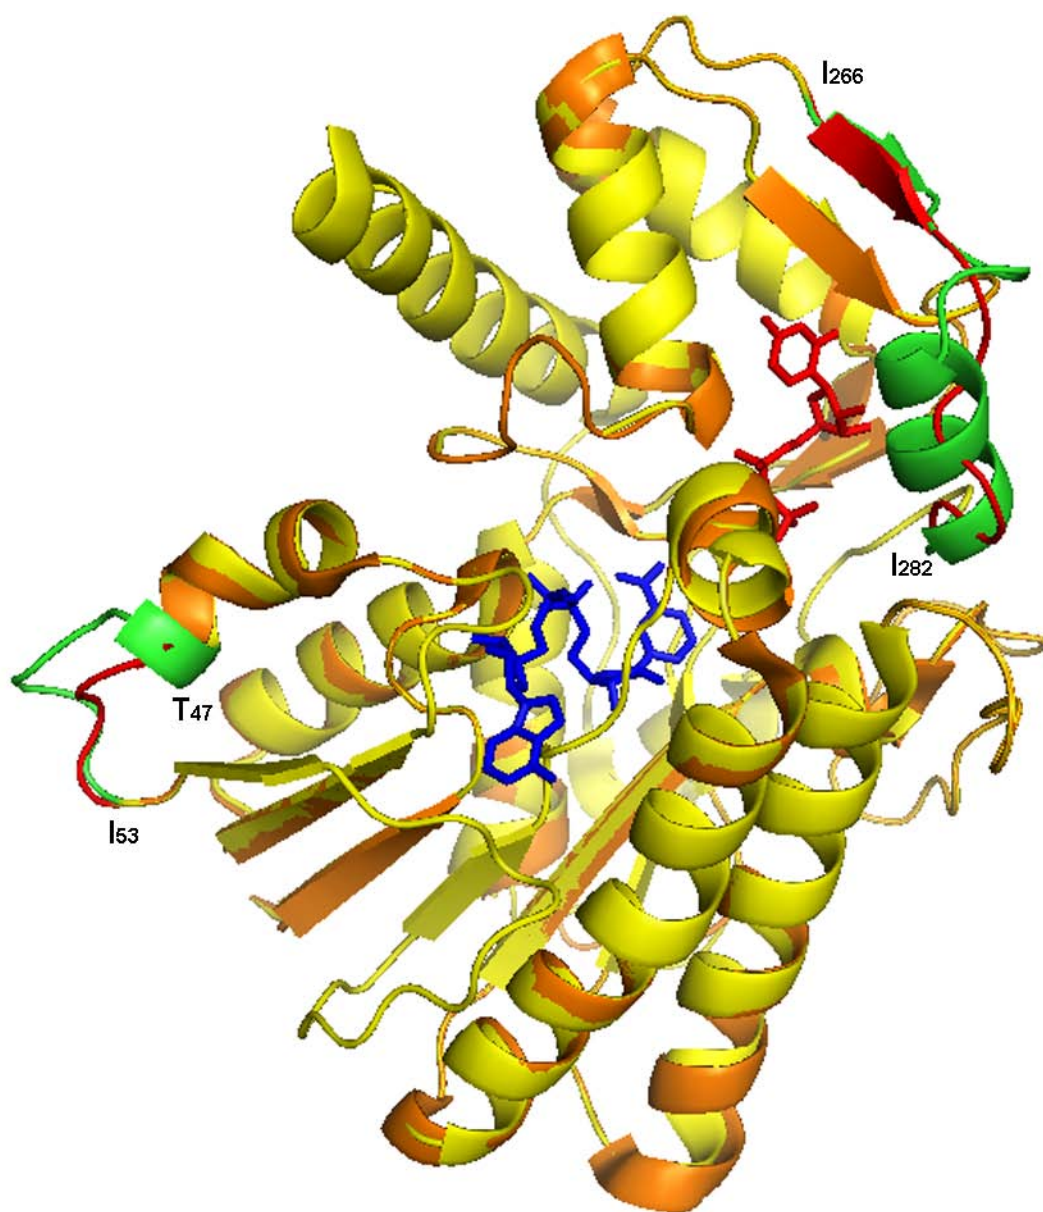

*Gu et al., 2010*
